# Supplementary material
Source: HighWire-hosted journal article supplement (https://www.rcpjournals.org/highwire/filestream/9826/field_highwire_adjunct_files/3/Quraishi_Supplementary_S4_stakeholders.pdf)
Supplement: Quraishi_Supplementary_S4_stakeholders.pdf [file Quraishi_Supplementary_S4_stakeholders.pdf]

## **Supplementary material S4 – Stakeholders**

---

The findings from the proof of concept study were widely presented to stakeholders including specialist advisory committees' chairs from all the physician specialties, heads of the postgraduate schools of medicine and the three trainees' committees. The trainees' committees represent trainees from the three royal colleges of physicians (London, Edinburgh & Glasgow).
